# Supplementary material
Source: MDPI journal article supplement (https://www.mdpi.com/2073-4441/11/2/327)
Supplement: s1 [file s1]

## Supplementary Material

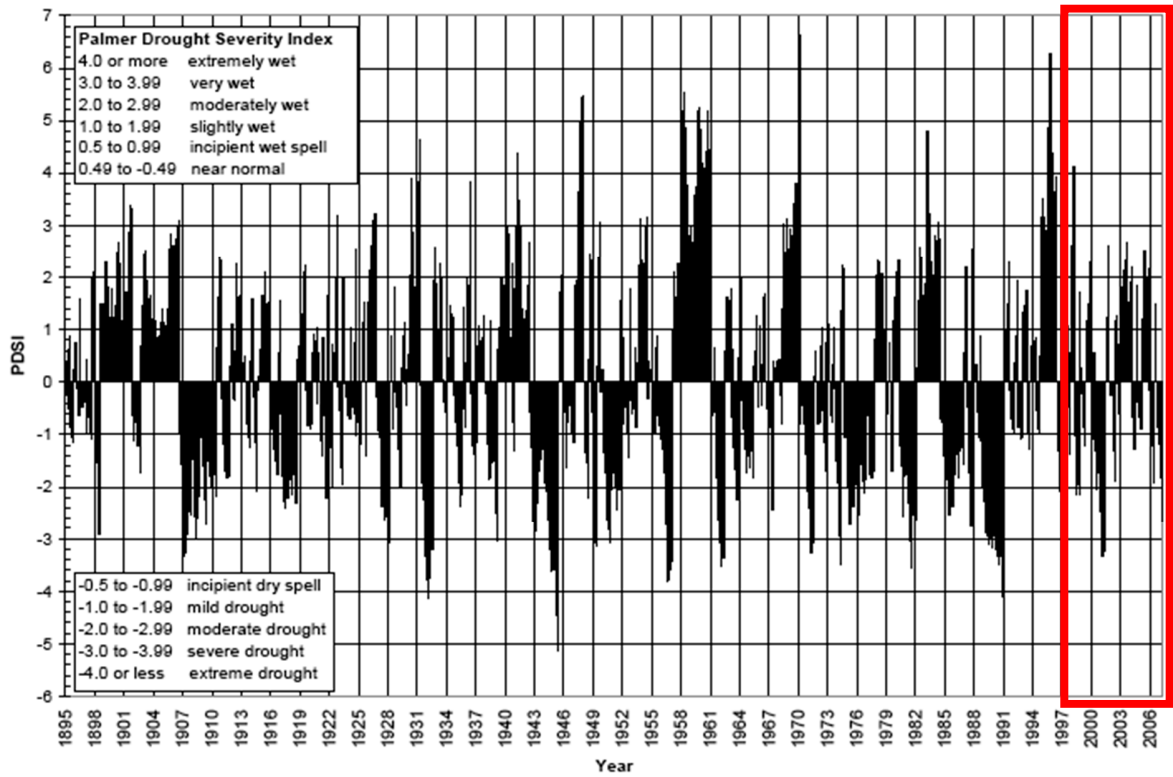

**Figure S1.** Historical Palmer Drought Severity Index for central-south Florida that includes Lake Okeechobee, the Everglades Agricultural Area, and the Everglades [25].

This figure indicates the long-term variability of Palmer Drought Severity Index (PDSI) in our study area. The PDSI is a well-established metric for hydroclimatic conditions such as drought. The figure shows that the PDSI in our study period (1998–2007) is quite comparable to the long-term variability, indicating the period captures a wide range of climatic conditions from very wet to severe drought.

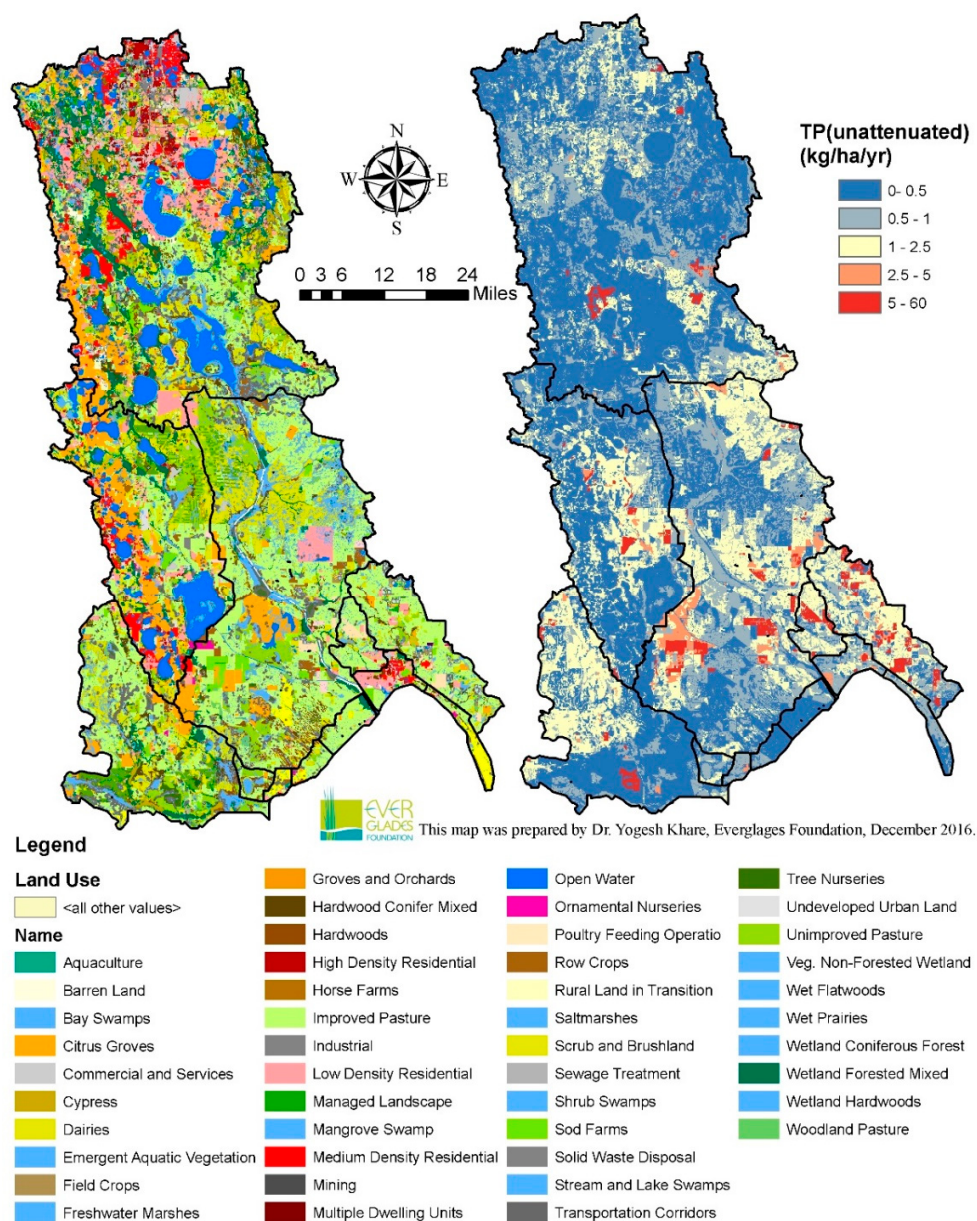

**Figure S2.** Maps of land use and source level phosphorus loading.

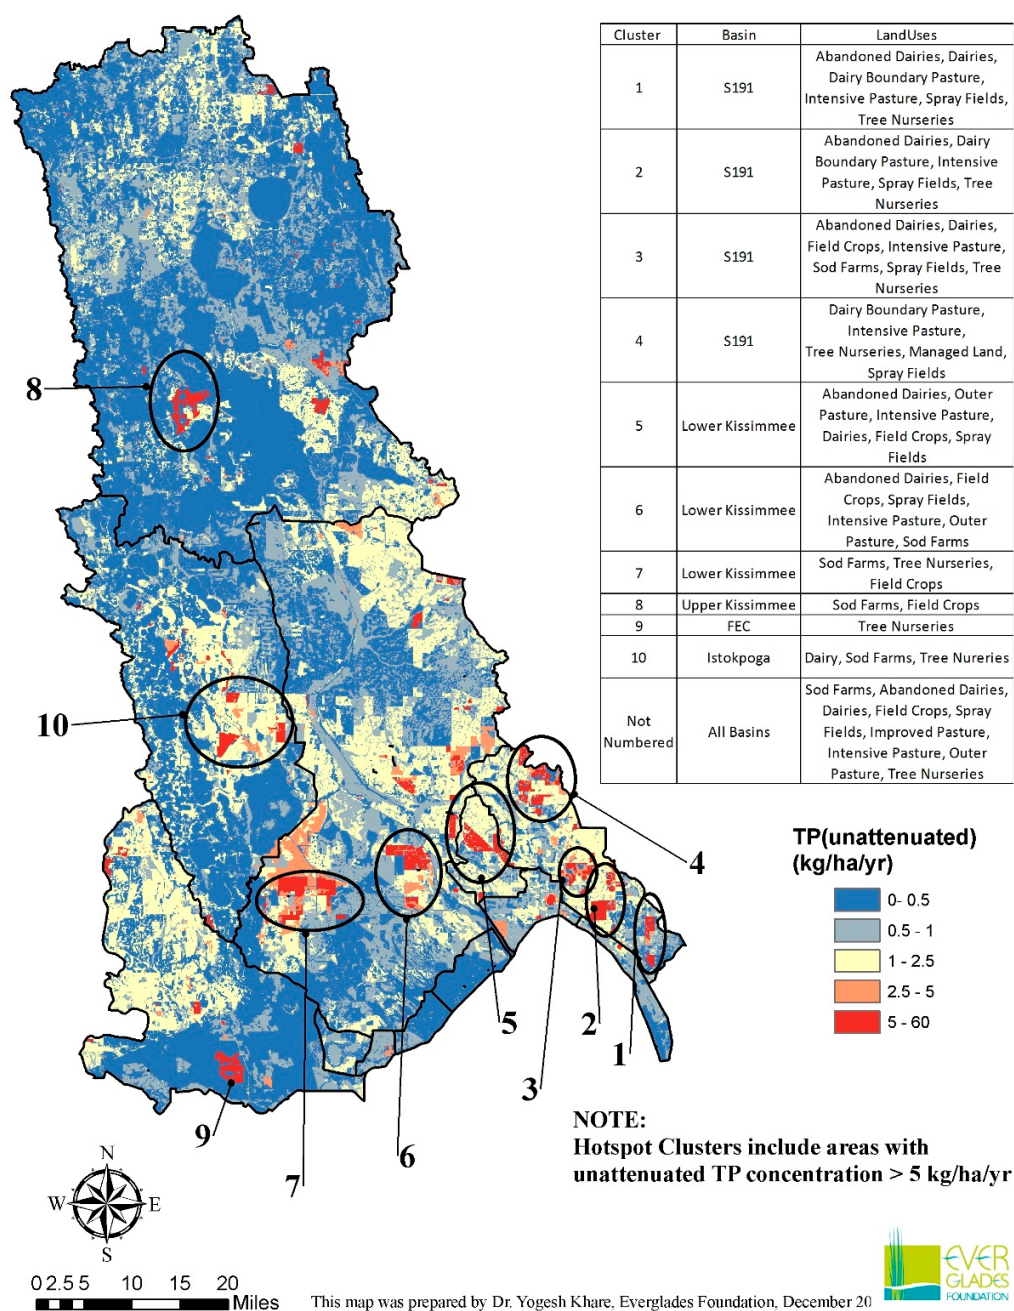

**Figure S3.** Phosphorus hot-spots in northern Lake Okeechobee basins under Base (1998–2007) conditions.

**Table S1.** Land use wise source level phosphorus loading summary for the northern Lake Okeechobee basins.

| Landuse                     | Average Annual TP load (kg/ha/year) |
|-----------------------------|-------------------------------------|
| Abandoned Dairies           | 8.3                                 |
| Animal Race Tracks          | 2.4                                 |
| Aquaculture                 | 4.2                                 |
| Barren Land                 | 0.8                                 |
| Bay Swamps                  | 0.6                                 |
| Bays and Estuaries          | 0.3                                 |
| Citrus Groves               | 0.7                                 |
| Commercial and Services     | 1.6                                 |
| Coniferous Plantation       | 0.2                                 |
| Cypress                     | 0.3                                 |
| Dairies                     | 4.5                                 |
| Dairies HIA - Treated       | 0.0                                 |
| Dairy Boundary Pasture      | 17.0                                |
| Emergent Aquatic Vegetation | 0.3                                 |
| Field Crops                 | 4.4                                 |
| Forested                    | 0.9                                 |
| Freshwater Marshes          | 0.6                                 |
| Groves and Orchards         | 3.7                                 |
| Hardwood Conifer Mixed      | 0.1                                 |
| Hardwoods                   | 0.1                                 |
| High Density Residential    | 0.8                                 |
| Horse Farms                 | 0.9                                 |
| Improved Pasture            | 1.1                                 |
| Industrial                  | 1.6                                 |
| Intensive Pasture           | 13.5                                |
| Low Density Residential     | 0.6                                 |
| Managed Landscape           | 3.1                                 |
| Mangrove Swamps             | 0.3                                 |
| Medium Density Residential  | 0.7                                 |
| Mining                      | 0.0                                 |
| Mixed Wetland Hardwood      | 0.4                                 |
| Multiple Dwelling Units     | 1.1                                 |
| Open Water                  | 0.1                                 |
| Ornamental Nurseries        | 0.9                                 |
| Other Urban                 | 1.0                                 |
| Poultry Feeding Operations  | 0.8                                 |
| Prisons                     | 3.0                                 |
| Ranchettes                  | 0.6                                 |
| Row Crops                   | 2.3                                 |
| Rural Land in Transition    | 0.5                                 |
| Saltmarshes                 | 0.5                                 |
| Scrub and Brushland         | 0.1                                 |
| Sewage Treatment            | 0.7                                 |
| Shrub Swamps                | 0.6                                 |
| Sod Farms                   | 5.8                                 |
| Solid Waste Disposal        | 0.8                                 |
| Spray Fields                | 7.0                                 |
| Stream and Lake Swamps      | 0.6                                 |
| Sugarcane                   | 0.5                                 |
| Transportation Corridors    | 0.8                                 |

|                           |      |
|---------------------------|------|
| Tree Nurseries            | 10.2 |
| Undeveloped Urban Land    | 0.3  |
| Unimproved Pasture        | 0.5  |
| Veg. Non-Forested Wetland | 0.2  |
| Water Bodies              | 0.2  |
| Wet Flatwoods             | 0.5  |
| Wet Prairies              | 0.2  |
| Wetland Coniferous Forest | 0.3  |
| Wetland Forested Mixed    | 0.6  |
| Wetland Hardwoods         | 0.6  |
| Wetlands                  | 0.8  |
| Woodland Pasture          | 0.6  |

**Table S2.** Summary of existing dispersed water management projects modeled under the DWP scenario (based on [60]).

| Basin     | DWP Project             | PWRM Estimated Annual Runoff Reduced (m <sup>3</sup> year <sup>-1</sup> ) |
|-----------|-------------------------|---------------------------------------------------------------------------|
| UK        | Sumica Tract            | 346,608                                                                   |
|           | Lost Oak Ranch          | 461,322                                                                   |
|           | Lykes West Waterhole    | 5,979,914                                                                 |
|           | Buck Island Ranch       | 1,940,265                                                                 |
|           | Dixie Ranch             | 1,055,859                                                                 |
|           | Dixie West              | 388,546                                                                   |
| LK        | Triple A Ranch          | 489,692                                                                   |
|           | Willaway Cattle and Sod | 282,467                                                                   |
|           | Buck Island Ranch 2     | 764,758                                                                   |
|           | Buck Island A, B, C     | 76,476                                                                    |
|           | Lazy O                  | 308,370                                                                   |
|           | Rafter T                | 1,601,058                                                                 |
| Istokpoga | Avon Park               | 12,334,806                                                                |
|           | Lake Wales              | 271,366                                                                   |
|           | XL Ranch                | 1,094,097                                                                 |
|           | Bluehead Ranch          | 4,270,310                                                                 |
| FEC_L61W  | Boney Ranch             | 370,044                                                                   |
|           | Francis Creek           | 57,974                                                                    |
|           | Mary Creek              | 256,564                                                                   |
|           | Payne and Son Ranch     | 1,149,604                                                                 |
| TCNS      | Williamson Cattle Ranch | 185,022                                                                   |
| Total     |                         | 34 × 10 <sup>6</sup>                                                      |
